# Supplementary material
Source: PubMed Central journal article supplement (PMC3990950)
Supplement: cn4002329_si_001.pdf [file cn4002329_si_001.pdf]

**Reversible Dimers of the Atypical Antipsychotic Quetiapine Inhibit P-glycoprotein-mediated Efflux *in vitro* with Increased Binding Affinity and *in situ* at the Blood Brain Barrier**

Dana Emmert,<sup>†#</sup> Christopher R. Campos,<sup>‡#</sup> David Ward,<sup>§</sup> Peihua Lu,<sup>§</sup> Hilda A. Namanja,<sup>†</sup> Kelsey Bohn,<sup>†</sup> David S. Miller,<sup>‡</sup> Frances J. Sharom,<sup>§</sup> Jean Chmielewski,<sup>†\*</sup> and Christine A. Hrycyna<sup>†\*</sup>

<sup>†</sup>Department of Chemistry, Purdue University, 560 Oval Drive, West Lafayette, IN 47907, USA

<sup>‡</sup>Laboratory of Toxicology and Pharmacology, National Institute of Environmental Health Sciences, National Institutes of Health, Research Triangle Park, NC 27709, USA

<sup>§</sup>Department of Molecular and Cellular Biology, University of Guelph, Guelph, Ontario, Canada, N1G 2W1

<sup>#</sup>Both authors contributed equally to this work

**CORRESPONDING AUTHOR:** \*To whom correspondence should be addressed (e-mail:

hrycyna@purdue.edu; chml@purdue.edu)

**Supplemental Information:**

Flow cytometry experiments shown in Figures S1 – S3 were carried out as described in *Methods*. These data were used to generate IC<sub>50</sub> values and dose response curves.

**Figure S1**

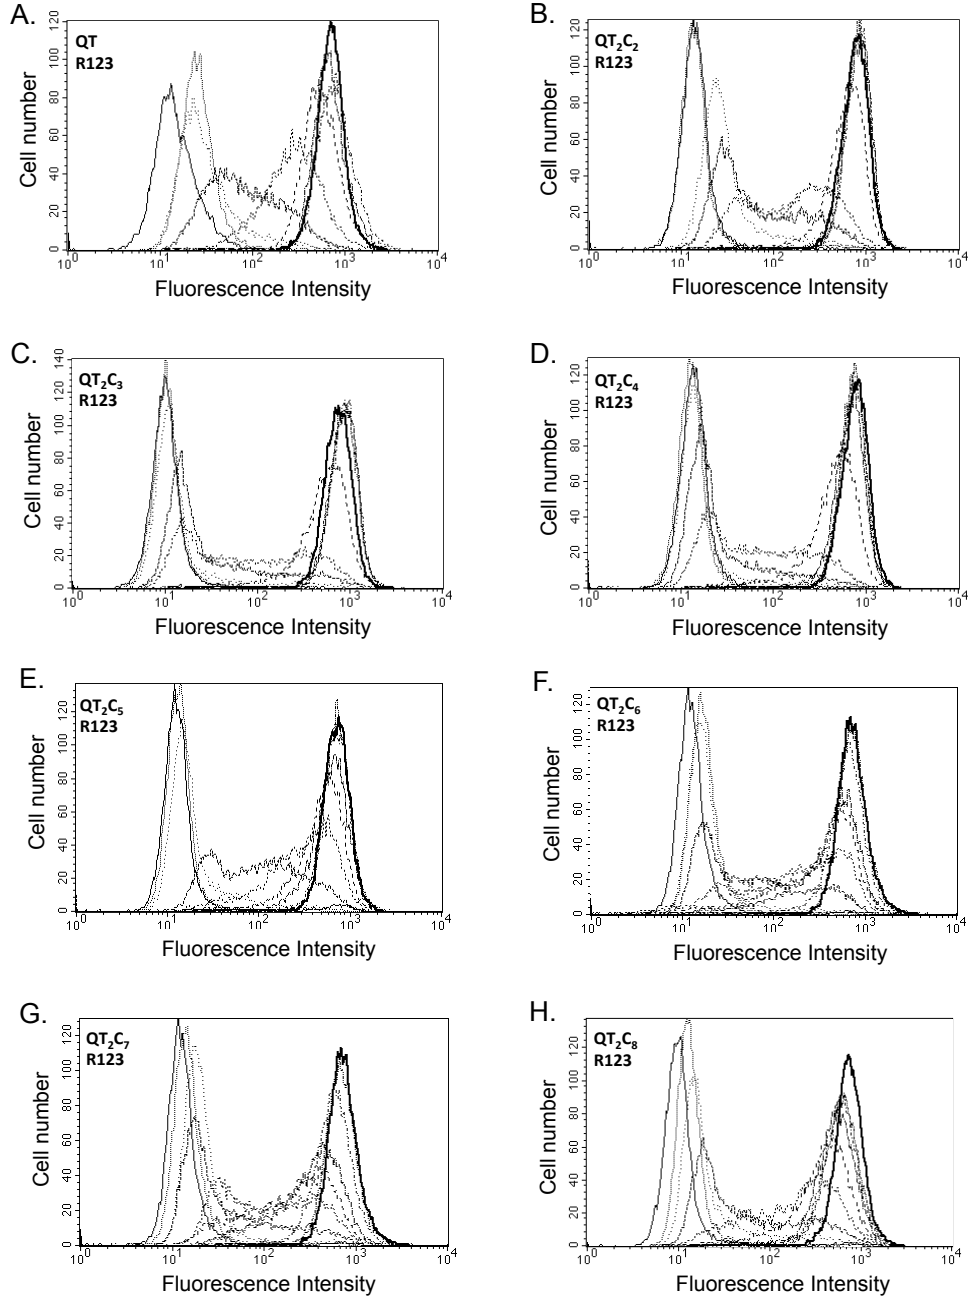

**Figure S1:** Dose response curves for MCF-7/DX1 cells treated with increasing concentrations of (A) QT with 0.5 µg/mL rhodamine 123: (—) DMSO, (—) 1 µM GF120918, (.....) 10 µM QT, (.....) 25 µM QT, (.....) 50 µM QT, (---) 100 µM QT, (---) 200 µM QT, (---) 300 µM QT, (---) 400 µM QT (B) QT<sub>2</sub>C<sub>2</sub> with 0.5 µg/mL rhodamine 123: (—) DMSO, (—) 1 µM GF120918, (.....) 0.1 µM QT<sub>2</sub>C<sub>2</sub>, (.....) 0.5 µM QT<sub>2</sub>C<sub>2</sub>, (.....) 0.75 µM QT<sub>2</sub>C<sub>2</sub>, (---) 1 µM QT<sub>2</sub>C<sub>2</sub>, (---) 2 µM QT<sub>2</sub>C<sub>2</sub>, (---) 3 µM QT<sub>2</sub>C<sub>2</sub>, (---) 5 µM QT<sub>2</sub>C<sub>2</sub>, (---) 10 µM QT<sub>2</sub>C<sub>2</sub>, (---) 10 µM QT<sub>2</sub>C<sub>2</sub> (C) QT<sub>2</sub>C<sub>3</sub> with 0.5 µg/mL rhodamine 123: (—) DMSO, (—) 1 µM GF120918, (.....) 0.1 µM QT<sub>2</sub>C<sub>3</sub>, (.....) 0.5 µM QT<sub>2</sub>C<sub>3</sub>, (---) 0.75 µM QT<sub>2</sub>C<sub>3</sub>, (---) 1 µM QT<sub>2</sub>C<sub>3</sub>, (---) 2 µM QT<sub>2</sub>C<sub>3</sub>, (---) 3 µM QT<sub>2</sub>C<sub>3</sub>, (---) 5 µM QT<sub>2</sub>C<sub>3</sub>, (---) 10 µM QT<sub>2</sub>C<sub>3</sub>, (---) 25 µM QT<sub>2</sub>C<sub>3</sub>, (---) 50 µM QT<sub>2</sub>C<sub>3</sub>, and (D) QT<sub>2</sub>C<sub>4</sub> with 0.5 µg/mL rhodamine 123: (—) DMSO, (—) 1 µM GF120918, (.....) 0.1 µM QT<sub>2</sub>C<sub>4</sub>, (.....) 0.5 µM QT<sub>2</sub>C<sub>4</sub>, (---) 0.75 µM QT<sub>2</sub>C<sub>4</sub>, (---) 1 µM QT<sub>2</sub>C<sub>4</sub>, (---) 2 µM QT<sub>2</sub>C<sub>4</sub>, (---) 3 µM QT<sub>2</sub>C<sub>4</sub>, (---) 5 µM QT<sub>2</sub>C<sub>4</sub>, (---) 10 µM QT<sub>2</sub>C<sub>4</sub> (E) QT<sub>2</sub>C<sub>5</sub> with 0.5 µg/mL rhodamine 123: (—) DMSO, (—) 1 µM GF120918, (.....) 0.1 µM QT<sub>2</sub>C<sub>5</sub>, (.....) 0.5 µM QT<sub>2</sub>C<sub>5</sub>, (---) 0.75 µM QT<sub>2</sub>C<sub>5</sub>, (---) 1 µM QT<sub>2</sub>C<sub>5</sub>, (---) 2 µM QT<sub>2</sub>C<sub>5</sub>, (---) 3 µM QT<sub>2</sub>C<sub>5</sub>, (---) 5 µM QT<sub>2</sub>C<sub>5</sub>, (---) 10 µM QT<sub>2</sub>C<sub>5</sub>, (---) 25 µM QT<sub>2</sub>C<sub>5</sub> (F) QT<sub>2</sub>C<sub>6</sub> with 0.5 µg/mL rhodamine 123: (—) DMSO, (—) 1 µM GF120918, (.....) 0.1 µM QT<sub>2</sub>C<sub>6</sub>, (.....) 0.5 µM QT<sub>2</sub>C<sub>6</sub>, (---) 0.75 µM QT<sub>2</sub>C<sub>6</sub>, (---) 1 µM QT<sub>2</sub>C<sub>6</sub>, (---) 2 µM QT<sub>2</sub>C<sub>6</sub>, (---) 3 µM QT<sub>2</sub>C<sub>6</sub>, (---) 5 µM QT<sub>2</sub>C<sub>6</sub>, (---) 10 µM QT<sub>2</sub>C<sub>6</sub>, (---) 25 µM QT<sub>2</sub>C<sub>6</sub> (G) QT<sub>2</sub>C<sub>7</sub> with 0.5 µg/mL rhodamine 123: (—) DMSO, (—) 1 µM GF120918, (.....) 0.1 µM QT<sub>2</sub>C<sub>7</sub>, (.....) 0.5 µM QT<sub>2</sub>C<sub>7</sub>, (---) 1 µM QT<sub>2</sub>C<sub>7</sub>, (---) 2 µM QT<sub>2</sub>C<sub>7</sub>, (---) 3 µM QT<sub>2</sub>C<sub>7</sub>, (---) 4 µM QT<sub>2</sub>C<sub>7</sub>, (---) 5 µM QT<sub>2</sub>C<sub>7</sub>, (---) 10 µM QT<sub>2</sub>C<sub>7</sub>, (---) 25 µM QT<sub>2</sub>C<sub>7</sub>, and (H) QT<sub>2</sub>C<sub>8</sub> with 0.5 µg/mL rhodamine 123: (—) DMSO, (—) 1 µM GF120918, (.....) 0.1 µM QT<sub>2</sub>C<sub>8</sub>, (.....) 0.5 µM QT<sub>2</sub>C<sub>8</sub>, (---) 0.75 µM QT<sub>2</sub>C<sub>8</sub>, (---) 1 µM QT<sub>2</sub>C<sub>8</sub>, (---) 2 µM QT<sub>2</sub>C<sub>8</sub>, (---) 3 µM QT<sub>2</sub>C<sub>8</sub>, (---) 5 µM QT<sub>2</sub>C<sub>8</sub>, (---) 10 µM QT<sub>2</sub>C<sub>8</sub>, (---) 25 µM QT<sub>2</sub>C<sub>8</sub>, (---) 50 µM QT<sub>2</sub>C<sub>8</sub>, (---) 100 µM QT<sub>2</sub>C<sub>8</sub>, (---) 150 µM QT<sub>2</sub>C<sub>8</sub>, (---) 200 µM QT<sub>2</sub>C<sub>8</sub>

**Figure S2**

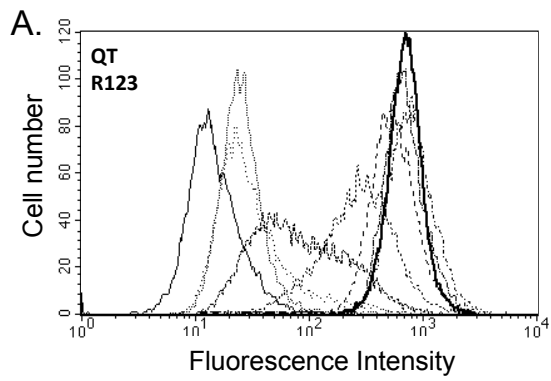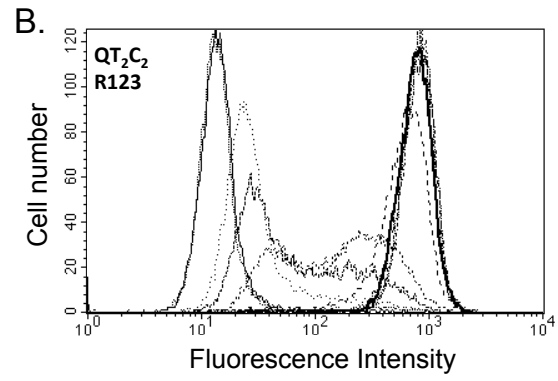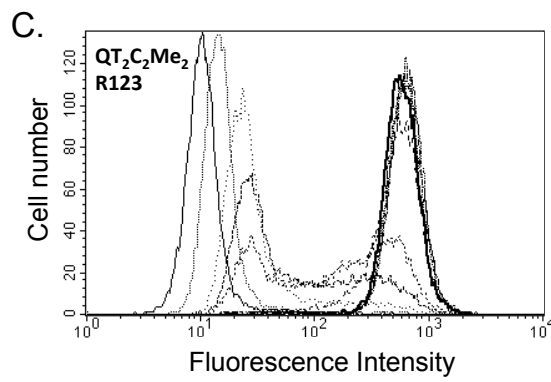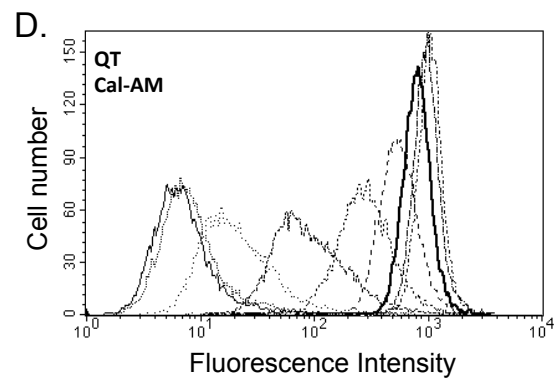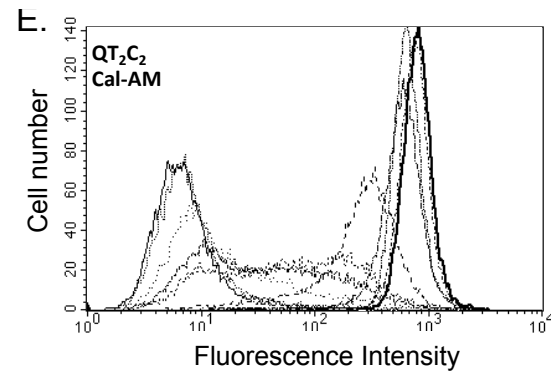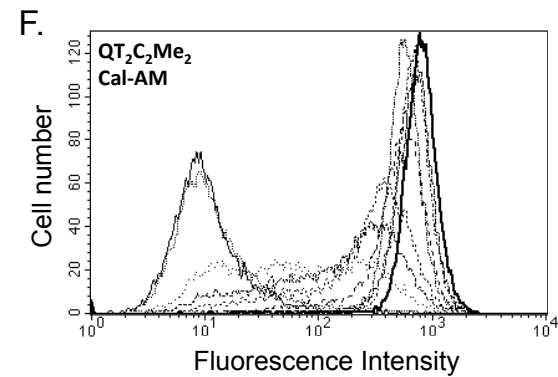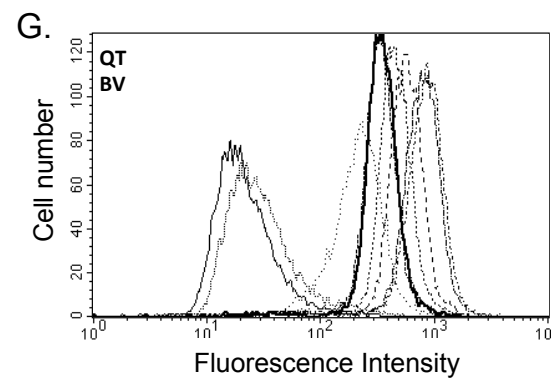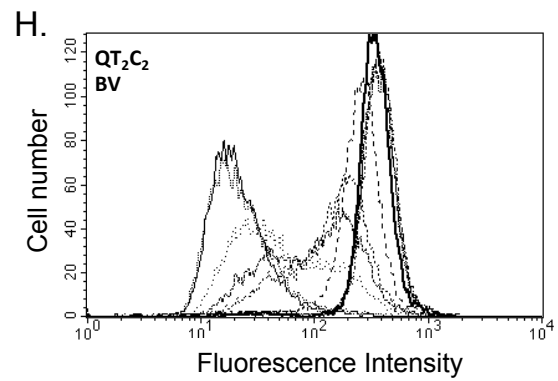

Figure S2 continued

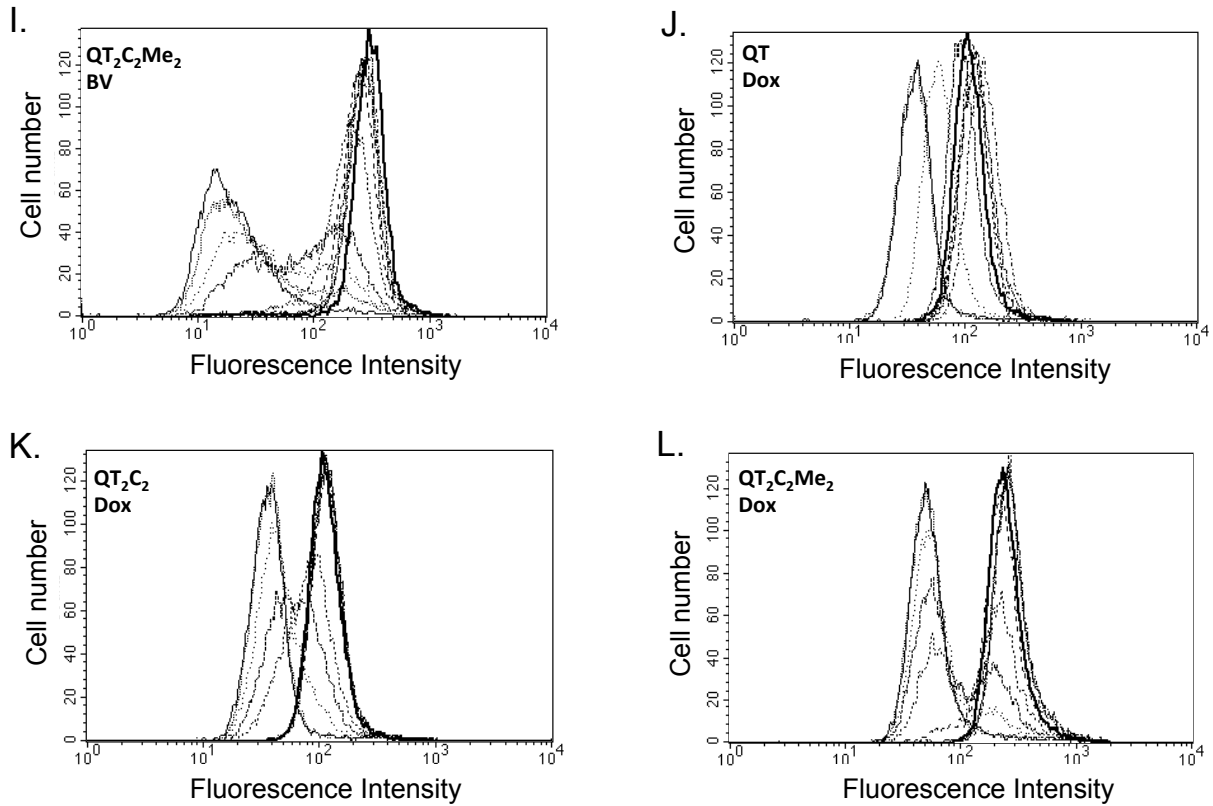

**Figure S2:** Dose response curves for MCF-7/DX1 cells treated with increasing concentrations of (A) QT with 0.5 µg/mL rhodamine 123: (—) DMSO, (—) 1 µM GF120918, (.....) 10 µM QT, (. . . .) 25 µM QT, (—) 50 µM QT, (---) 100 µM QT, (- - -) 200 µM QT, (- - -) 300 µM QT, (- - -) 400 µM QT (B) QT<sub>2</sub>C<sub>2</sub> with 0.5 µg/mL rhodamine 123: (—) DMSO, (—) 1 µM GF120918, (.....) 0.1 µM QT<sub>2</sub>C<sub>2</sub>, (. . . .) 0.5 µM QT<sub>2</sub>C<sub>2</sub>, (---) 0.75 µM QT<sub>2</sub>C<sub>2</sub>, (- - -) 1 µM QT<sub>2</sub>C<sub>2</sub>, (- - -) 2 µM QT<sub>2</sub>C<sub>2</sub>, (- - -) 3 µM QT<sub>2</sub>C<sub>2</sub>, (- - -) 5 µM QT<sub>2</sub>C<sub>2</sub>, (- - -) 10 µM QT<sub>2</sub>C<sub>2</sub> (C) QT<sub>2</sub>C<sub>2</sub>Me<sub>2</sub> with 0.5 µg/mL rhodamine 123: (—) DMSO, (—) 1 µM GF120918, (.....) 0.1 µM QT<sub>2</sub>C<sub>2</sub>Me<sub>2</sub>, (. . . .) 0.5 µM QT<sub>2</sub>C<sub>2</sub>Me<sub>2</sub>, (---) 0.75 µM QT<sub>2</sub>C<sub>2</sub>Me<sub>2</sub>, (- - -) 1 µM QT<sub>2</sub>C<sub>2</sub>Me<sub>2</sub>, (- - -) 2 µM QT<sub>2</sub>C<sub>2</sub>Me<sub>2</sub>, (- - -) 3 µM QT<sub>2</sub>C<sub>2</sub>Me<sub>2</sub>, (- - -) 5 µM QT<sub>2</sub>C<sub>2</sub>Me<sub>2</sub>, (- - -) 10 µM QT<sub>2</sub>C<sub>2</sub>Me<sub>2</sub>, (- - -) 25 µM QT<sub>2</sub>C<sub>2</sub>Me<sub>2</sub>, (- - -) 50 µM QT<sub>2</sub>C<sub>2</sub>Me<sub>2</sub> (D) QT with 0.5 µM calcein-AM: (—) DMSO, (—) 1 µM GF120918, (.....) 1 µM QT, (. . . .) 10 µM QT, (---) 25 µM QT, (- - -) 50 µM QT, (- - -) 100 µM QT, (- - -) 300 µM QT, (- - -) 400 µM QT (E) QT<sub>2</sub>C<sub>2</sub> with 0.5 µM calcein-AM: (—) DMSO, (—) 1 µM GF120918, (.....) 0.1 µM QT<sub>2</sub>C<sub>2</sub>, (. . . .) 0.5 µM QT<sub>2</sub>C<sub>2</sub>, (---) 0.75 µM QT<sub>2</sub>C<sub>2</sub>, (- - -) 1 µM QT<sub>2</sub>C<sub>2</sub>, (- - -) 2 µM QT<sub>2</sub>C<sub>2</sub>, (- - -) 5 µM QT<sub>2</sub>C<sub>2</sub>, (- - -) 10 µM QT<sub>2</sub>C<sub>2</sub>, (- - -) 25 µM QT<sub>2</sub>C<sub>2</sub>, (- - -) 50 µM QT<sub>2</sub>C<sub>2</sub>, (- - -) 100 µM QT<sub>2</sub>C<sub>2</sub>, (- - -) 200 µM QT<sub>2</sub>C<sub>2</sub>, (- - -) 300 µM QT<sub>2</sub>C<sub>2</sub>, (- - -) 400 µM QT<sub>2</sub>C<sub>2</sub> (F) QT<sub>2</sub>C<sub>2</sub>Me<sub>2</sub> with 0.5 µM calcein-AM: (—) DMSO, (—) 1 µM GF120918, (.....) 0.1 µM QT<sub>2</sub>C<sub>2</sub>Me<sub>2</sub>, (. . . .) 0.5 µM QT<sub>2</sub>C<sub>2</sub>Me<sub>2</sub>, (---) 0.75 µM QT<sub>2</sub>C<sub>2</sub>Me<sub>2</sub>, (- - -) 1 µM QT<sub>2</sub>C<sub>2</sub>Me<sub>2</sub>, (- - -) 2 µM QT<sub>2</sub>C<sub>2</sub>Me<sub>2</sub>, (- - -) 5 µM QT<sub>2</sub>C<sub>2</sub>Me<sub>2</sub>, (- - -) 10 µM QT<sub>2</sub>C<sub>2</sub>Me<sub>2</sub>, (- - -) 25 µM QT<sub>2</sub>C<sub>2</sub>Me<sub>2</sub>, (- - -) 50 µM QT<sub>2</sub>C<sub>2</sub>Me<sub>2</sub> (G) QT with 0.5 µM BODIPY-FL-verapamil: (—) DMSO, (—) 1 µM GF120918, (.....) 1 µM QT, (. . . .) 10 µM QT, (---) 25 µM QT, (- - -) 50 µM QT, (- - -) 100 µM QT, (- - -) 300 µM QT, (- - -) 400 µM QT (H) QT<sub>2</sub>C<sub>2</sub> with 0.5 µM BODIPY-FL-verapamil: (—) DMSO, (—) 1 µM GF120918, (.....) 0.1 µM QT<sub>2</sub>C<sub>2</sub>, (. . . .) 0.5 µM QT<sub>2</sub>C<sub>2</sub>, (---) 0.75 µM QT<sub>2</sub>C<sub>2</sub>, (- - -) 1 µM QT<sub>2</sub>C<sub>2</sub>, (- - -) 2 µM QT<sub>2</sub>C<sub>2</sub>, (- - -) 5 µM QT<sub>2</sub>C<sub>2</sub>, (- - -) 10 µM QT<sub>2</sub>C<sub>2</sub>, (- - -) 25 µM QT<sub>2</sub>C<sub>2</sub>, (- - -) 50 µM QT<sub>2</sub>C<sub>2</sub>, (- - -) 100 µM QT<sub>2</sub>C<sub>2</sub>, (- - -) 200 µM QT<sub>2</sub>C<sub>2</sub>, (- - -) 300 µM QT<sub>2</sub>C<sub>2</sub>, (- - -) 400 µM QT<sub>2</sub>C<sub>2</sub> (I) QT<sub>2</sub>C<sub>2</sub>Me<sub>2</sub> with 0.5 µM BODIPY-FL-verapamil: (—) DMSO, (—) 1 µM GF120918, (.....) 0.1 µM QT<sub>2</sub>C<sub>2</sub>Me<sub>2</sub>, (. . . .) 0.5 µM QT<sub>2</sub>C<sub>2</sub>Me<sub>2</sub>, (---) 0.75 µM QT<sub>2</sub>C<sub>2</sub>Me<sub>2</sub>, (- - -) 1 µM QT<sub>2</sub>C<sub>2</sub>Me<sub>2</sub>, (- - -) 2 µM QT<sub>2</sub>C<sub>2</sub>Me<sub>2</sub>, (- - -) 3 µM QT<sub>2</sub>C<sub>2</sub>Me<sub>2</sub>, (- - -) 5 µM QT<sub>2</sub>C<sub>2</sub>Me<sub>2</sub>, (- - -) 10 µM QT<sub>2</sub>C<sub>2</sub>Me<sub>2</sub>, (- - -) 25 µM QT<sub>2</sub>C<sub>2</sub>Me<sub>2</sub>, (- - -) 50 µM QT<sub>2</sub>C<sub>2</sub>Me<sub>2</sub> (J) QT with 3 µM doxorubicin: (—) DMSO, (—) 1 µM GF120918, (.....) 1 µM QT, (. . . .) 10 µM QT, (---) 25 µM QT, (- - -) 50 µM QT, (- - -) 100 µM QT, (- - -) 300 µM QT, (- - -) 400 µM QT (K) QT<sub>2</sub>C<sub>2</sub> with 3 µM doxorubicin: (—) DMSO, (—) 1 µM GF120918, (.....) 0.1 µM QT<sub>2</sub>C<sub>2</sub>, (. . . .) 0.5 µM QT<sub>2</sub>C<sub>2</sub>, (---) 0.75 µM QT<sub>2</sub>C<sub>2</sub>, (- - -) 1 µM QT<sub>2</sub>C<sub>2</sub>, (- - -) 2 µM QT<sub>2</sub>C<sub>2</sub>, (- - -) 5 µM QT<sub>2</sub>C<sub>2</sub>, (- - -) 10 µM QT<sub>2</sub>C<sub>2</sub>, (- - -) 25 µM QT<sub>2</sub>C<sub>2</sub>, (- - -) 50 µM QT<sub>2</sub>C<sub>2</sub>, (- - -) 100 µM QT<sub>2</sub>C<sub>2</sub>, (- - -) 200 µM QT<sub>2</sub>C<sub>2</sub>, (- - -) 300 µM QT<sub>2</sub>C<sub>2</sub>, (- - -) 400 µM QT<sub>2</sub>C<sub>2</sub> (L) QT<sub>2</sub>C<sub>2</sub>Me<sub>2</sub> with 3 µM doxorubicin: (—) DMSO, (—) 1 µM GF120918, (.....) 0.1 µM QT<sub>2</sub>C<sub>2</sub>Me<sub>2</sub>, (. . . .) 0.5 µM QT<sub>2</sub>C<sub>2</sub>Me<sub>2</sub>, (---) 0.75 µM QT<sub>2</sub>C<sub>2</sub>Me<sub>2</sub>, (- - -) 1 µM QT<sub>2</sub>C<sub>2</sub>Me<sub>2</sub>, (- - -) 2 µM QT<sub>2</sub>C<sub>2</sub>Me<sub>2</sub>, (- - -) 5 µM QT<sub>2</sub>C<sub>2</sub>Me<sub>2</sub>, (- - -) 10 µM QT<sub>2</sub>C<sub>2</sub>Me<sub>2</sub>, (- - -) 25 µM QT<sub>2</sub>C<sub>2</sub>Me<sub>2</sub>, (- - -) 50 µM QT<sub>2</sub>C<sub>2</sub>Me<sub>2</sub>

**Figure S3**

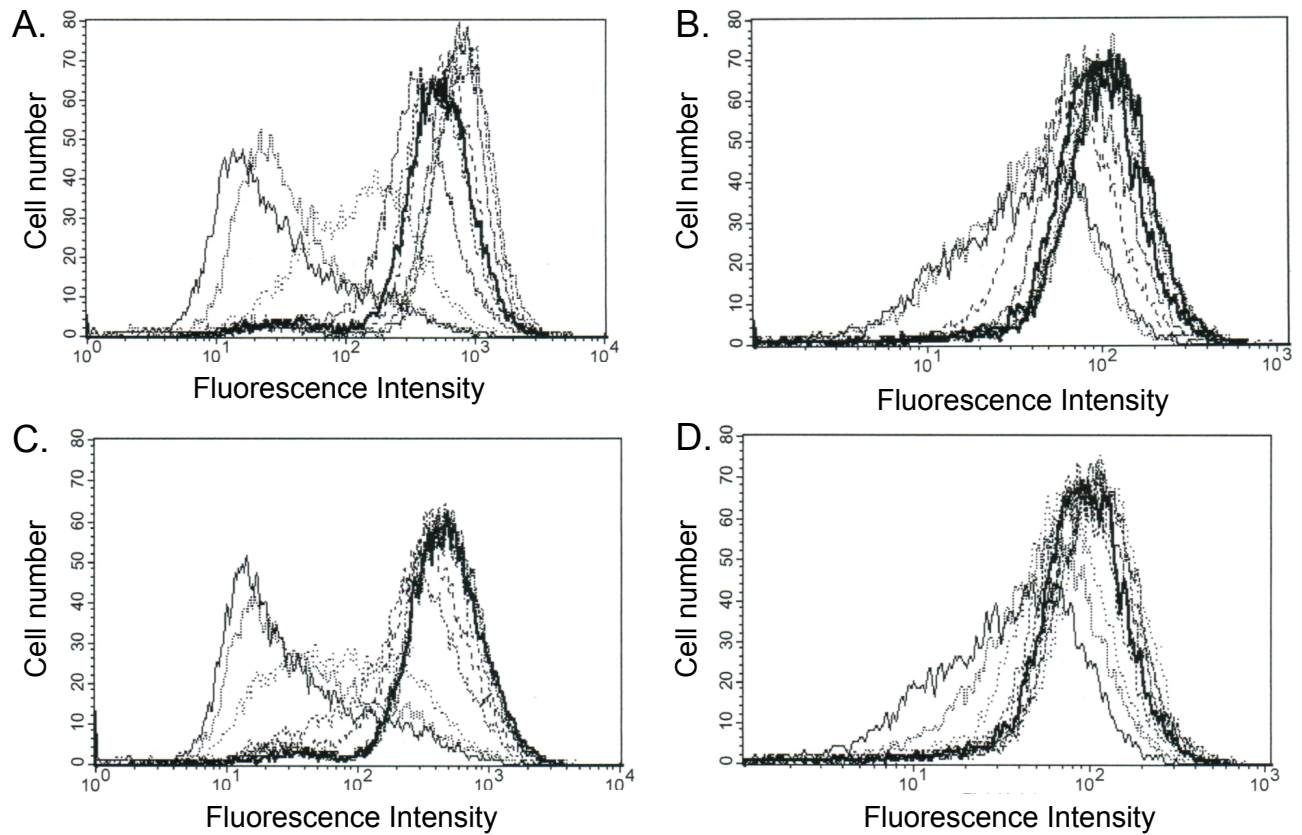

Figure S3: Dose response curves for hCMEC/D3 cells treated with increasing concentrations of (A) QT with 0.5 µg/mL rhodamine 123: (—) DMSO, (—) 1 µM GF120918, (.....) 1 µM QT, (.....) 10 µM QT, (.....) 25 µM QT, (- - -) 50 µM QT, (- - -) 100 µM QT, (- - -) 200 µM QT, (- - -) 300 µM QT, (- - -) 400 µM QT; (B) QT with 0.5 µM calcein AM: (—) DMSO, (—) 1 µM GF120918, (.....) 1 µM QT, (.....) 5 µM QT, (.....) 10 µM QT, (- - -) 25 µM QT, (- - -) 50 µM QT, (- - -) 100 µM QT, (- - -) 200 µM QT, (- - -) 300 µM QT (C) QT<sub>2</sub>C<sub>2</sub>Me<sub>2</sub> with 0.5 µg/mL rhodamine 123: (—) DMSO, (—) 1 µM GF120918, (.....) 0.1 µM QT<sub>2</sub>C<sub>2</sub>Me<sub>2</sub>, (.....) 0.25 µM QT<sub>2</sub>C<sub>2</sub>Me<sub>2</sub>, (.....) 0.5 µM QT<sub>2</sub>C<sub>2</sub>Me<sub>2</sub>, (- - -) 0.75 µM QT<sub>2</sub>C<sub>2</sub>Me<sub>2</sub>, (- - -) 2 µM QT<sub>2</sub>C<sub>2</sub>Me<sub>2</sub>, (- - -) 3 µM QT<sub>2</sub>C<sub>2</sub>Me<sub>2</sub>, (- - -) 7.5 µM QT<sub>2</sub>C<sub>2</sub>Me<sub>2</sub>, (- - -) 10 µM QT<sub>2</sub>C<sub>2</sub>Me<sub>2</sub>, and (D) QT<sub>2</sub>C<sub>2</sub>Me<sub>2</sub> with 0.5 µM calcein AM: (—) DMSO, (—) 1 µM GF120918, (.....) 0.1 µM QT<sub>2</sub>C<sub>2</sub>Me<sub>2</sub>, (.....) 0.25 µM QT<sub>2</sub>C<sub>2</sub>Me<sub>2</sub>, (.....) 0.4 µM QT<sub>2</sub>C<sub>2</sub>Me<sub>2</sub>, (- - -) 0.5 µM QT<sub>2</sub>C<sub>2</sub>Me<sub>2</sub>, (- - -) 1 µM QT<sub>2</sub>C<sub>2</sub>Me<sub>2</sub>, (- - -) 2 µM QT<sub>2</sub>C<sub>2</sub>Me<sub>2</sub>, (- - -) 5 µM QT<sub>2</sub>C<sub>2</sub>Me<sub>2</sub>, (- - -) 10 µM QT<sub>2</sub>C<sub>2</sub>Me<sub>2</sub>
